1  
2 Associations between ADHD symptom remission and white  
3 matter microstructure: a longitudinal analysis

4 **A.E.M.Leenders<sup>1\*</sup>, C.G.Damatac<sup>1,2\*</sup>, S.Soheili-Nezhad<sup>1,2</sup>, R.J.M.Chauvin<sup>1,2</sup>,**

6 **M.J.J.Mennes<sup>1,2</sup>, M.P.Zwiers<sup>1,2</sup>, D.vanRooij<sup>1,2</sup>, S.E.A.Akkermans<sup>1,3</sup>, J.Naaijen<sup>1,2</sup>,**

7 **B.Franke<sup>3,4</sup>, J.K.Buitelaar<sup>1,2,5</sup>, C.F.Beckmann<sup>1,2,6</sup>, E.Sprooten<sup>1,2</sup>**

8 <sup>1</sup>Centre for Cognitive Neuroimaging, Donders Institute for Brain, Cognition and Behaviour,

9 Radboud University, Nijmegen, the Netherlands; <sup>2</sup>Department of Cognitive Neuroscience,

10 Donders Institute for Brain, Cognition and Behaviour, Radboud University Medical Centre,

11 Nijmegen, the Netherlands; <sup>3</sup>Department of Human Genetics, Donders Institute for Brain,

12 Cognition and Behaviour, Radboud University Medical Centre, Nijmegen, the Netherlands;

13 <sup>4</sup>Department of Psychiatry, Donders Institute for Brain, Cognition and Behaviour, Radboud

14 University, Nijmegen, the Netherlands; <sup>5</sup>Karakter Child and Adolescent Psychiatry

15 University Centre, Nijmegen, the Netherlands; <sup>6</sup>Centre for Functional MRI of the Brain,

16 University of Oxford, Oxford, UK

17 \* Authors contributed equally to this work.

18

19

20

21 **Abstract**

22 **Background:** Attention-deficit hyperactivity disorder (ADHD) is associated with white matter  
23 (WM) microstructure. Our objective was to investigate how WM microstructure is  
24 longitudinally related to symptom remission in adolescents and young adults with ADHD.  
25 **Methods:** We obtained diffusion-weighted imaging (DWI) data from 99 participants at two  
26 time points (mean age baseline: 16.91 years, mean age follow-up: 20.57 years). We used voxel-  
27 wise Tract-Based Spatial Statistics (TBSS) with permutation-based inference to investigate  
28 associations of inattention (IA) and hyperactivity-impulsivity (HI) symptom change with  
29 fractional anisotropy (FA) at baseline, follow-up, and change between time points. **Results:**  
30 Remission of combined HI and IA symptoms was significantly associated with reduced FA at  
31 follow-up in the left superior longitudinal fasciculus and the left corticospinal tract (CST)  
32 ( $P_{FWE}=0.038$  and  $P_{FWE}=0.044$ , respectively), mainly driven by an association between HI  
33 remission and follow-up CST FA ( $P_{FWE}=0.049$ ). There was no significant association of  
34 combined symptom decrease with FA at baseline or with changes in FA between the two  
35 assessments. **Conclusions:** In this longitudinal DWI study of ADHD using dimensional  
36 symptom scores, we show that greater symptom decrease is associated with lower follow-up  
37 FA in specific WM tracts. Altered FA thus may appear to follow, rather than precede, changes  
38 in symptom remission. Our findings indicate divergent WM developmental trajectories  
39 between individuals with persistent and remittent ADHD, and support the role of prefrontal  
40 and sensorimotor tracts in the remission of ADHD. **Keywords:** ADHD; white matter; dMRI;  
41 remission; longitudinal. **Abbreviations:** white matter(WM), NeuroIMAGE1(TP1),  
42 NeuroIMAGE2(TP2)

## 43 **Introduction**

44 Attention-deficit/hyperactivity disorder (ADHD) is a common neuropsychiatric disorder  
45 characterized by developmentally inappropriate levels of inattention (IA) and/or hyperactivity-  
46 impulsivity (HI), with an estimated prevalence of 5% in children and adolescents and 2.5% in  
47 adults(Faraone et al., 2015). For many, ADHD begins in childhood, but the long-term clinical  
48 course of ADHD varies widely between individuals(American Psychiatric Association, 2013).  
49 Prospective studies suggest that although only 15% of children with ADHD continue to fully  
50 meet diagnostic criteria in adulthood, 60-70% of them retain impairing symptoms in  
51 adulthood(Faraone et al., 2015). ADHD diagnosis has been associated with altered patterns of  
52 brain structure and function, however the neural mechanisms related to symptom progression  
53 (i.e. remission vs. persistence) have not yet been fully unraveled (Aoki, Cortese, & Castellanos,  
54 2018; Damatac et al., 2020; Francx, Zwiers, et al., 2015; Franke et al., 2018; Hoogman et al.,  
55 2017). Understanding this could help develop and tailor treatments to benefit long-term  
56 outcomes for children with ADHD.

57         The underlying neural mechanisms that drive symptom remission may be distinct from  
58 those that drive ADHD onset, thus the brains of remitted individuals could be methodologically  
59 differentiated from those of people who were never diagnosed with ADHD(Halperin & Schulz,  
60 2006). Here, we refer to symptom remission as a dimensional concept, as a decrease in  
61 symptom severity between two time-points. Symptom remission can be driven by a number of  
62 neurodevelopmental mechanisms which are not mutually exclusive. Previous hypotheses  
63 suggest that disorder onset is characterized by a fixed anomaly or ‘scar’, while symptom  
64 remission or persistence is associated with brain maturation and normalization, or  
65 compensation and reorganization(Sudre, Mangalmurti, & Shaw, 2018). The trajectories of  
66 remission and persistence from childhood through adulthood occur in parallel to or in  
67 interaction with other neurodevelopmental processes (e.g.development of executive functions).

68           The development of frontal and temporal areas engaged in emotional and cognitive  
69 processes does not plateau until adulthood, which coincides with the typical age range of  
70 ADHD symptom remission(Faraone et al., 2015; Lebel & Deoni, 2018). Maturation in these  
71 regions may compensate for the initial childhood development of ADHD symptoms through  
72 top-down regulatory processes, leading to eventual symptom remission(Halperin & Schulz,  
73 2006). Therefore, longitudinal cohort studies are essential to dissect the upstream, parallel, or  
74 downstream brain mechanisms in reference to symptom remission. Compared to a cross-  
75 sectional approach, a longitudinal design provides not only unique insights into the temporal  
76 dynamics of underlying biological processes, but also increased statistical power by reducing  
77 between-subject variability(Madhyastha et al., 2014).

78           Neurodevelopmental mechanisms underlying the variable long-term course of ADHD  
79 may be partly traceable using neuroimaging. Healthy brain development has been characterized  
80 using structural and functional magnetic resonance imaging (MRI), showing trajectories across  
81 the lifespan of regional volumes and activity/connectivity, respectively(Brouwer et al., 2020;  
82 van Duijvenvoorde, Westhoff, de Vos, Wierenga, & Crone, 2019). Those that have applied  
83 diffusion, magnetization transfer, relaxometry, and myelin water imaging methods have also  
84 demonstrated consistent, rapid white matter (WM) microstructural changes in the first three  
85 years of life, reflecting increased myelination or axonal packing(Lebel & Deoni, 2018). These  
86 changes continue throughout adolescence and are associated with corresponding age-related  
87 changes in gray matter(Giorgio et al., 2008). However, regarding later childhood and  
88 adolescence, the paucity of congruous findings in other WM imaging modalities besides  
89 diffusion weighted imaging (DWI) suggests that changes are primarily related to myelination  
90 and axonal packing(Lebel & Deoni, 2018). With age, WM increases in overall volume,  
91 becoming more myelinated in a region-specific fashion and reaching peak values later in  
92 life(Kochunov et al., 2012; Paus et al., 2001). The rate of development differs between WM

93 regions, progressing in an outward, central-to-peripheral direction, wherein sensory and motor  
94 regions generally mature the earliest.

95         DWI studies have revealed WM microstructural abnormalities in ADHD, specifically  
96 using fractional anisotropy (FA), which is the metric we focus on here(Aoki et al., 2018;  
97 Damatac et al., 2020; van Ewijk et al., 2014; Francx, Oldehinkel, et al., 2015; Shaw et al.,  
98 2015; Sudre et al., 2018). DWI reveals information about anatomical connectivity in the brain  
99 *in vivo* by measuring the directionality of water diffusion in WM tracts, thus enabling  
100 inferences about underlying brain mechanisms by quantifying associated changes in  
101 (inter)cellular space(Beaulieu, 2002; van Ewijk et al., 2014). FA is an indirect measure of  
102 microstructural integrity—sensitive to myelination, parallel organization and fiber bundle  
103 density. A systematic meta-analysis of case-control DWI studies in ADHD found that lower  
104 FA in ADHD has mostly been reported in interhemispheric, frontal and temporal regions—  
105 however, higher FA has also been found in similar areas(Aoki et al., 2018). Given these  
106 previous WM associations with ADHD and the brain’s maturation in those same areas during  
107 an age range typical for symptom remission, the next step is to determine how WM  
108 microstructural alterations coincide with remission versus persistence of ADHD symptoms  
109 over time.

110         Not many longitudinal studies have examined the neurobiological underpinnings of  
111 symptom remission in WM—and none have longitudinally applied DWI. While there are no  
112 previous studies with longitudinal DWI measurements, there have been some clinical  
113 longitudinal studies with one DWI measurement. A follow-up DWI analysis three decades after  
114 diagnosis supports the theory of the disorder as an enduring neurobiological trait independent  
115 of remission; both remittent and persistent probands with an ADHD diagnosis in childhood  
116 had widespread reduced FA compared to those who did not have childhood ADHD(Cortese et  
117 al., 2013). Conversely, a network connectivity analysis of two clinical assessments and one

118 resting-state functional MRI measurement at follow-up pointed to the presence of  
119 compensatory mechanisms that aid symptomatic remission in prefrontal regions and the  
120 executive control network: higher connectivity at follow-up was associated with HI decreases  
121 (Francx, Oldehinkel, et al., 2015). A study performed with a sample overlapping with the  
122 current study (but at an earlier sampling time with mean age 11.9-17.8 years) found, somewhat  
123 counterintuitively, that more HI symptom remission was associated with lower FA in the left  
124 corticospinal tract (ICST) and left superior longitudinal fasciculus (ISLF) at follow-up(Francx,  
125 Zwiers, et al., 2015). This previous study included clinical data from two time-points and only  
126 one DWI time-point.

127         Our current investigation is a continuation of our earlier DWI work in this cohort, and  
128 extends upon it in three ways. First, by capturing an older age range, we have a more complete  
129 picture of symptom remission (mean age range: 16.91-20.57 years; [Figure 1](#) illustrates how our  
130 study chronologically relates to that of Francx *et al.*(2015). Second, DWI measurements at two  
131 time-points allow for a more thorough investigation of the chronology and mechanisms of FA  
132 development in relation to symptom remission. Third, we used Permutation Analysis of Linear  
133 Models(PALM), a newly available permutation-based analysis technique, to account for the  
134 family structure in our sample(Winkler, Webster, Vidaurre, Nichols, & Smith, 2015). We  
135 aimed to examine whether symptom remission may be underpinned by WM alterations as  
136 adolescents with ADHD develop into adulthood. Given our longitudinal DWI data, we were  
137 able to distinguish between (1) pre-existing WM features that predict the likelihood of  
138 symptoms to remit or persist, (2) WM changes over time that occur concurrently with symptom  
139 change, and (3) WM alterations that may be a (direct or indirect) downstream consequence of  
140 symptom remission versus persistence.

## 141 **Methods**

### 142 *Participants*

143 Clinical and MRI data were collected in two waves from probands with childhood ADHD,  
144 their first-degree relatives, and healthy families: NeuroIMAGE1(TP1) and  
145 NeuroIMAGE2(TP2)(Müller et al., 2011a, 2011b; von Rhein et al., 2015). The current study  
146 included probands, affected and unaffected siblings, and healthy controls who participated in  
147 both TP1 and TP2 and had DWI data from both waves(N=120). After we excluded  
148 subjects([Figure S1](#)), there were 99 participants from 65 families in our final sample (see  
149 characteristics in [Table 1](#)). For both time-point groups, there were no differences between the  
150 participants included in the current analysis and the complete sample on measures of ADHD  
151 severity, age, and sex( $P>0.05$ ). We normalized head motion z-scores after excluding outliers.  
152 Global FA at TP1, TP2, and the difference between TP1 and TP2 were normally distributed.

153         Given the longitudinal design of our study, we did not split our participants into cases  
154 versus controls; there were those who were diagnosed as unaffected at both time-points, as well  
155 as those who had a symptom score of zero in all dimensions at both time-points ([Figure S2](#)).  
156 Our sample includes controls, or people who do not have (subthreshold) ADHD; however, this  
157 group of people changed between the waves of the study ([Figure S3](#)). Some individuals  
158 originally recruited as controls or unaffected siblings developed ADHD at a later time point  
159 and others recruited as patients remitted. Moreover, ADHD may be operationalized as a  
160 continuous trait rather than a binary diagnostic variable, especially in longitudinal studies  
161 (Lahey & Willcutt, 2010; Marcus & Barry, 2011). In a previous cross-sectional study we  
162 specifically showed that, compared to categorical diagnoses, continuous symptom measures  
163 were more sensitive to diffusion-weighted brain features in this sample (Damatac et al., 2020).  
164 Therefore, we focus on participants' ADHD symptom scores in all models, thus optimizing our

165 design and methods for capturing the dynamic and continuous nature of the ADHD spectrum  
166 throughout adolescence.

### 167 *Clinical measurements*

168 Conners Parent Rating Scale(CPRS) questionnaires were used to assess the severity of 27  
169 inattention(IA) and hyperactive-impulsive(HI) symptoms at TP1 and TP2(Conners et al.,  
170 1999). We used CPRS instead of the self-rated report because it was the consistent measure  
171 across waves and ages. We used raw CPRS scores to increase the distribution width, and  
172 analyzed HI, IA, and combined symptom scores per subject, per time-point. Here, we define  
173 symptom change as the score difference: $\Delta\text{CPRS}=\text{CPRS}_{\text{TP1}}-\text{CPRS}_{\text{TP2}}$ . Thus, a more positive  $\Delta$   
174 value indicates more symptom improvement.

### 175 *Data acquisition and DWI pre-processing*

176 MRI data were acquired with a 1.5-Tesla AVANTO scanner(Siemens, Erlangen, Germany).  
177 The scanner was equipped with an 8-channel receive-only phased-array head coil. Whole-brain  
178 diffusion-weighted images were collected(twice refocused pulsed-gradient spin-echo EPI; 60  
179 diffusion-weighted directions spanning an entire sphere; b-value 1000s/mm<sup>2</sup>; 5 non-diffusion  
180 weighted images; interleaved slice acquisition; TE/TR=97/8500ms; GRAPPA-acceleration  
181 factor 2; no partial Fourier; voxel size 2x2x2.2mm). DWI acquisition parameters are described  
182 in detail elsewhere(von Rhein et al., 2015).

### 183 *Longitudinal TBSS*

184 We performed whole brain voxel-wise analyses with Tract-Based Spatial Statistics  
185 (TBSS)(Smith et al., 2006). Our study's longitudinal design necessitated an analysis pipeline  
186 that considered how within-subject changes may be greater than between-subject changes;  
187 intra-subject data alignment across time brings extra difficulty compared to cross-subject  
188 nonlinear registration to common space. We used a bespoke pipeline adapted from others to



189 create non-biased individual subject templates(Madhyastha et al., 2014). [Figure 2](#) summarizes  
190 our pipeline(detailed in [Figure S1](#)).

### 191 *Statistical analysis*

192 We constructed three general linear models for our voxel-wise analyses ([Table S1](#)). We kept  
193 difference in raw CPRS score( $\Delta$ CPRS) as a constant predictor, while separately testing FA at  
194 baseline( $FA_{TP1}$ ), follow-up( $FA_{TP2}$ ), and the difference between TP1 and TP2 ( $\Delta$ FA) as  
195 dependent variables. Our covariates included sex, normalized head motion(framewise  
196 displacement) at respective time point(s), age at TP1, age difference between TP1 and TP2,  
197 and CPRS symptom score at TP1([Table S1](#), [Figure S4](#)). Our main analyses first examined  
198 combined symptom scores and, if significant, subsequent analyses examined whether effects  
199 were driven by HI or IA.

200 We used PALM to account for the lack of independence in the data due to sibling  
201 relationships and shared variance between families, constraining permutation tests between  
202 families of the same sizes(Winkler, Ridgway, Webster, Smith, & Nichols, 2014). We designed  
203 multi-level exchangeability blocks which did not allow permutation among all individuals;  
204 permutations were constrained both at the whole-block level (i.e. permute between families of  
205 the same size) and the within-block level (i.e. permute within families)([Figure S5](#)). We  
206 corrected for multiple testing by running 5000 permutations and threshold-free cluster  
207 enhancement(TFCE) as implemented in PALM, part of the FSL toolbox  
208 (<https://fsl.fmrib.ox.ac.uk/fsl/fslwiki/PALM>)(Smith & Nichols, 2009). Results with TFCE-  
209 corrected  $P<0.05$  were considered statistically significant. All tests used the standard parameter  
210 settings for height, extent, and connectivity: H=2, E=1, C=26. We used the Johns Hopkins  
211 University DTI-based WM atlas (<https://fsl.fmrib.ox.ac.uk/fsl/fslwiki/Atlases>) to relate  
212 significant clusters to known WM tracts.

## 213 **Results**

### 214 *Symptom change over time*

215 In [Table 1](#), we present mean symptom scores for HI, IA, and combined (HI+IA). Combined  
216 symptom scores significantly decreased over time ( $t(98)=4.884, P_{FWE}=2.027\times 10^{-6}$ ). This was  
217 due to decreases in both IA scores ( $t(98)=4.226, P_{FWE}=2.672\times 10^{-5}$ ) and HI scores  
218 ( $t(98)=4.394, P_{FWE}=1.410\times 10^{-5}$ ), with a mean decrease of 2.04(SD=4.80) in IA, and  
219 1.46(SD=3.30) in HI score.

### 220 *Symptom change in relation to WM microstructure at two time-points*

221 As a point of reference: Participants who showed relatively more symptom remission had FA  
222 values that moved neither towards nor away from that of those who were diagnosed as never  
223 affected; their global FA values increased over time at a similar rate as the never affected  
224 individuals, while those who essentially persisted or developed more symptoms over time  
225 showed a slightly steeper increase in FA than the other two groups ([Figure S6](#)).

226 Our models demonstrated no significant association between combined symptom score  
227 remission and  $FA_{TP1}$ , but there was a significant negative association between combined  
228 symptom score remission and  $FA_{TP2}$  in two regions according to the atlas: ISLF( $P_{FWE}=0.038$ )  
229 and ICST( $P_{FWE}=0.044$ )([Table 2; Figure 3A](#)). This was mainly driven by a negative effect of HI  
230 dimension score on FA in ICST( $P_{FWE}=0.049$ )([Table 2; Figure 3B](#)).

231 Additionally, there was a negative trend association between combined symptom score  
232 difference and FA difference ( $P_{FWE}=0.079$ ). Because our one model with a significant effect,  
233 as well as those previously reported in an overlapping sample at an earlier time window, were  
234 driven by HI, we performed an exploratory *post-hoc* analysis on symptom score difference and  
235 FA difference with only HI dimension scores(Brouwer et al., 2020; Damatac et al., 2020;  
236 Franx, Zwiers, et al., 2015). Our exploratory results show that larger HI symptom decrease

237 was associated with a larger decrease in FA over time in ten clusters spread over six WM  
238 tracts([Table S2](#), [Figure S7](#)).

### 239 *Post hoc tests of confounders and demographics*

240 Sex, normalized head motion at respective time point(s), age at TP1, age difference between  
241 TP1 and TP2, and CPRS symptom score at TP1 were included as covariates in all models. We  
242 report main effects after the removal of non-significant interaction effects in [Table 2](#). We found  
243 neither a significant main effect nor an interaction effect of any of these covariates with  $\Delta$ CPRS  
244 for all analyses reported above([Table S3](#)).

## 245 **Discussion**

246 In this longitudinal investigation of ADHD and WM microstructure, we report that higher  
247 symptom decrease is associated with lower FA at follow-up in ICST and ISLF, an effect mainly  
248 driven by HI symptom decrease. Thereby, we have essentially replicated and extended the  
249 findings reported by Francx, Zwiers, et al. (2015) at an older age range, contributing to the  
250 growing body of evidence describing the progression of ADHD and its relation with WM.  
251 Additionally, we utilized an improved statistical method to account for the family structure in  
252 our data, thus confirming that previous results in this cohort were not confounded by within-  
253 family correlations(Winkler et al., 2015). By substantiating those earlier findings, with  
254 replication in participants at an older age, and upon better accounting for family relatedness,  
255 we conclude that a decrease in symptoms from early adolescence is associated with lower FA  
256 in late adolescence and young adulthood.

257 Our longitudinal design of two diagnostic and two DWI time-points allows us to  
258 speculate about the chronology of brain changes versus symptom changes. First, we found no  
259 evidence that baseline FA predicts ADHD symptom change over time. Second, though a  
260 natural expectation would be that more remission leads to higher FA, we found the opposite,

261 somewhat paradoxical result: Greater ADHD symptom decrease was associated with lower FA  
262 at follow-up in ISLF and ICST. Third, we found that HI, not IA, symptom decrease was the  
263 main driver behind the association with reduced FA in ICST. WM microstructure can change  
264 in response to behavior or learning (i.e. plasticity). It is possible that decreased (motor)  
265 hyperactivity is associated with less use of corticospinal and motor tracts, which may lead to  
266 decreased FA in this area at TP2. Overall, lower FA in both tracts appears to follow, rather than  
267 precede, symptom decrease. Speculatively, this suggests that the WM changes may be a  
268 downstream result, rather than a cause, of symptom remission in ADHD.

269 FA is an indirect reflection of microstructure and some neuronal processes that improve  
270 anatomical connectivity may paradoxically manifest as decreased FA in some locations—  
271 especially in principal WM highways through which several fibers cross, like the SLF and  
272 CST. At the axonal level, more sprouting, pruning, crossing fibers or fiber dispersion in those  
273 tracts during maturation may demonstrate as reduced FA over time. Plasticity in myelin or axon  
274 integrity in less dominant fibers could also exhibit as reduced FA in voxels containing multiple  
275 fiber orientations. In our participants whose symptoms persisted, higher FA could be the  
276 outcome of brain reorganization in less dominant fiber tracts, particularly in those that traverse  
277 the CST and SLF. Event-related and resting-state functional MRI studies that grouped their  
278 subjects categorically have reported that remitters have stronger connectivity than  
279 persisters (Clerkin et al., 2013; Francx, Oldehinkel, et al., 2015). Lower functional connectivity  
280 in certain tracts may be related to higher FA in other tracts and vice versa. In a top-down  
281 fashion, remitters may learn compensatory strategies to overcome their ADHD symptoms as  
282 they age, while persisters may either learn disadvantageous strategies, other beneficial  
283 compensatory strategies, or none at all, leading to divergent trajectories of WM development  
284 in various brain regions in individuals with persistent ADHD symptoms (Wetterling et al.,  
285 2015).

286 One can find in the literature several instances wherein the SLF and CST are implicated  
287 in ADHD. The SLF generally subserves a wide variety of functions related to language,  
288 attention, memory, emotion, and visuospatial function; many studies have pointed to its  
289 function in visuospatial awareness, as well as attentional selection of sensory content(Conner  
290 et al., 2018; Shaw et al., 2015; Wolfers et al., 2015). Our findings are partly in accordance with  
291 those of others that have found neurodevelopmental effects linked with unilaterally  
292 compromised ISLF maturation during adolescence(Peters et al., 2012). Thus, ADHD symptom  
293 persistence may influence higher unilateral SLF integrity as a person develops from early  
294 adolescence to young adulthood. The CST integrates cortical and lower brain processing  
295 centers in the motor system, has an important role in modulating sensory information, and may  
296 be particularly relevant to motor hyperactivity in ADHD(Moreno-López, Olivares-Moreno,  
297 Cordero-Erausquin, & Rojas-Piloni, 2016). Altered modulation of sensory information could  
298 potentially be involved in HI remission, as the CST contains fibers running from the primary  
299 motor, premotor, supplementary motor, somatosensory, parietal and cingulate cortex to the  
300 spine and is thus involved in the control of complex voluntary distal movements(Welniarz,  
301 Dusart, & Roze, 2017). Correspondingly, the persistence of HI could, indeed, result in  
302 increased FA in CST through time. Our unilateral findings may have risen from the fact that  
303 88% of our subjects were right-handed, and most CST axons cross to the contralateral side at  
304 the pyramidal decussation before reaching lower motor neurons(Welniarz et al., 2017). We  
305 found no evidence that handedness was correlated with change in symptom scores ([Table S4](#)).

306 Based on previous investigations that have similarly found effects of ADHD symptoms  
307 on WM microstructure driven by HI, we also conducted an exploratory analysis of only HI  
308 symptom remission effects on change in FA(Damatac et al., 2020; Francx, Zwiers, et al., 2015).  
309 Our results may suggest that HI symptom remission is associated with more decrease in FA  
310 over time. Most of the associations we found were clustered in prefrontal and frontostriatal

311 regions. Higher functional connectivity in prefrontal networks in young adults has been  
312 associated with more improvement in symptoms over time(Clerkin et al., 2013; Francx, Zwiers,  
313 et al., 2015). Likewise, the prefrontal cortex and its connections are especially important in the  
314 remission or persistence of ADHD symptoms(Francx, Oldehinkel, et al., 2015; Halperin &  
315 Schulz, 2006). As it continues to develop throughout adolescence, the prefrontal cortex can  
316 potentially compensate for the initial causes of ADHD through its connectivity with subcortical  
317 regions such as the striatum. Indeed, a study using independent component analysis  
318 demonstrated that ADHD diagnosis was significantly associated with reduced brain volume in  
319 a component that mapped to the frontal lobes, the striatum, and their interconnecting WM  
320 tracts(Cupertino et al., 2019). Although exploratory and tentative, our finding of decreased FA  
321 in frontostriatal regions coinciding with HI symptom remission is thus in line with Halperin &  
322 Schulz's theory (2006): Neural plasticity and the development of the prefrontal cortex and  
323 interconnected neural circuits facilitate recovery over the course of development.

324 We used a dimensional approach in defining the ADHD phenotype, in line with our  
325 recent findings in a large overlapping cohort wherein no evidence was found for altered FA in  
326 association with categorical ADHD diagnosis(Damatac et al., 2020). Unaffected participants  
327 clustered at the low end of the score distribution. Given the relatively small number of fully  
328 remitted patients (N=5), together with a subset of 'partly remitted' individuals, our use of  
329 symptom severity as a continuous variable maximized power to detect symptom-related  
330 changes, while also circumventing arbitrary decisions on the definition of remission(Du Rietz  
331 et al., 2016). We thus interpret our findings in terms of symptom severity, reflecting the degree  
332 of remission in ADHD patients as well as variation in individuals who do not reach diagnostic  
333 threshold.

334 Head motion is quite typical in the ADHD population and is hence a common confound  
335 in such studies(Aoki et al., 2018; Yendiki, Koldewyn, Kakunoori, Kanwisher, & Fischl, 2014;

336 Zwiers, 2010). A previous meta-analysis of DWI studies in ADHD found that most  
337 investigations that controlled for head motion did not have significant results(Aoki et al., 2018).  
338 We normalized head motion and included it as a confound covariate in all of our analyses, as  
339 well as checked each model for an interaction effect with the head motion parameter. We found  
340 no evidence that it had an influence on our results.

341 FA estimates can be less accurate in brain regions consisting of so-called “kissing”  
342 and/or crossing fibers, like the CST and SLF. FA gives only one value for the overall restriction  
343 of anisotropy in a voxel, which could be a crucial aspect in the inconsistency of findings in the  
344 literature regarding WM and ADHD. Future studies may include complementary longitudinal  
345 region-of-interest tractography analyses in the clusters that we found to be significant, or by  
346 using DWI methods that deliver greater resolution at the neurite level. Techniques that utilize  
347 orientation dispersion indices or WM fiber density could potentially provide clarity in the  
348 constant discourse of how crossing fibers can mar inferences about FA and brain effects of  
349 ADHD. Likewise, incorporating additional DWI data from more than two time points  
350 throughout development would, naturally, increase statistical power and enhance our  
351 understanding of the dynamic interplay between disorder and development. Due to the wide  
352 age range in our sample, we checked for but did not find interactions with baseline age.  
353 Nonetheless, more complex, nonlinear patterns with age may exist across the age ranges we  
354 studied. We cannot assume that the relationship between symptom change and brain change is  
355 a constant process throughout the entire age range in this study.

## 356 **Conclusion**

357 We used two DWI time-points in a longitudinal study of dimensional symptom scores in  
358 ADHD. Our results indicate that, in specific WM tracts, greater symptom improvement results  
359 in lower FA at follow-up. We show that WM alterations may occur downstream of symptom  
360 change. The effects we have found confirm and extend earlier findings in an overlapping

361 sample; they indicate divergent trajectories of WM development in individuals with persistent  
362 ADHD symptoms compared to those showing remittance, and support the role of prefrontal  
363 and sensorimotor development in the symptom remission of ADHD.

### 364 **Acknowledgments**

365 The NeuroIMAGE study was supported by National Institutes of Health Grant No.  
366 R01MH62873 (to Stephen V. Faraone), NWO Large Investment Grant No. 1750102007010  
367 (to JKB), NWO Brain & Cognition Grant Nos. 056-13-015 (to JKB) and 433-09-242 (to JKB),  
368 ZonMW Grant No. 60-60600-97-193 (to JKB), and a matching grant from Radboud University  
369 Medical Center.

### 370 **Correspondence**

371  
372 Christienne G. Damatac, Department of Cognitive Neuroscience, Donders Centre for  
373 Cognition, Donders Institute for Brain, Cognition and Behaviour, Kapittelweg 29, 6525 EN  
374 Nijmegen, The Netherlands; Email: [c.gonzalesdamatac@donders.ru.nl](mailto:c.gonzalesdamatac@donders.ru.nl)

375



## Key points

- Attention-deficit hyperactivity disorder is associated with white matter microstructure, but little is known about how they are longitudinally related as a child develops into adulthood.
- We used voxel-wise Tract-Based Spatial Statistics with permutation-based inference to investigate how symptom score change relates to fractional anisotropy in individuals with ADHD and typically developing controls over a period of about four years.
- We provided for the first time, evidence that altered FA appears to follow, rather than precede, changes in symptom remission.
- Our findings indicate divergent white matter developmental trajectories between individuals with persistent and remittent ADHD, and support the role of prefrontal and sensorimotor tracts in the remission of ADHD.

376  
377

## 378 References

- 379 American Psychiatric Association. (2013). *American Psychiatric Association, 2013.*  
380 *Diagnostic and statistical manual of mental disorders (5th ed.). American Journal of*  
381 *Psychiatry.*
- 382 Aoki, Y., Cortese, S., & Castellanos, F. X. (2018). Research Review: Diffusion tensor  
383 imaging studies of attention-deficit/hyperactivity disorder: meta-analyses and reflections  
384 on head motion. *Journal of Child Psychology and Psychiatry and Allied Disciplines,*  
385 *59(3), 193–202.*
- 386 Beaulieu, C. (2002). The basis of anisotropic water diffusion in the nervous system - A  
387 technical review. *NMR in Biomedicine, 15(7–8), 435–455.*
- 388 Brouwer, R. M., Klein, M., Grasby, K. L., Schnack, H. G., Jahanshad, N., Teeuw, J.,  
389 Thomopoulos, S. I., et al. (2020). Dynamics of Brain Structure and its Genetic  
390 Architecture over the Lifespan. *bioRxiv.*

- 391 Clerkin, S. M., Schulz, K. P., Berwid, O. G., Fan, J., Newcorn, J. H., Tang, C. Y., &  
392 Halperin, J. M. (2013). Thalamo-cortical activation and connectivity during response  
393 preparation in adults with persistent and remitted ADHD. *American Journal of*  
394 *Psychiatry*, *170*(9), 1011–1019.
- 395 Conner, A. K., Briggs, R. G., Rahimi, M., Sali, G., Baker, C. M., Burks, J. D., Glenn, C. A.,  
396 et al. (2018). A Connectomic Atlas of the Human Cerebrum—Chapter 10: Tractographic  
397 Description of the Superior Longitudinal Fasciculus. *Operative Neurosurgery*,  
398 *15*(suppl\_1), S407–S422.
- 399 Conners, C. K., Erhardt, D., Epstein, J. N., Parker, J. D. A., Sitarenios, G., & Sparrow, E.  
400 (1999). Self-ratings of ADHD symptoms in adults I: Factor structure and normative  
401 data. *Journal of Attention Disorders*.
- 402 Cortese, S., Imperati, D., Zhou, J., Proal, E., Klein, R. G., Mannuzza, S., Ramos-Olazagasti,  
403 M. A., et al. (2013). White matter alterations at 33-year follow-up in adults with  
404 childhood attention-deficit/hyperactivity disorder. *Biological psychiatry*, *74*(8), 591–8.  
405 Retrieved from <http://www.ncbi.nlm.nih.gov/pubmed/23566821>
- 406 Cupertino, R. B., Soheili-Nezhad, S., Grevet, E. H., Bandeira, C. E., Picon, F. A., Tavares,  
407 M. E., Naaijen, J., et al. (2019). Reduced fronto-striatal volume in ADHD in two cohorts  
408 across the lifespan. *bioRxiv*.
- 409 Damatac, C. G., Chauvin, R. J. M., Zwiers, M. P., van Rooij, D., Akkermans, S. E. A.,  
410 Naaijen, J., Hoekstra, P. J., et al. (2020). White Matter Microstructure in Attention-  
411 Deficit/Hyperactivity Disorder: A Systematic Tractography Study in 654 Individuals.  
412 *Biological Psychiatry: Cognitive Neuroscience and Neuroimaging*, 1–10. Elsevier Inc.  
413 Retrieved from <https://doi.org/10.1016/j.bpsc.2020.07.015>
- 414 van Duijvenvoorde, A. C. K., Westhoff, B., de Vos, F., Wierenga, L. M., & Crone, E. A.  
415 (2019). A three-wave longitudinal study of subcortical–cortical resting-state

- 416 connectivity in adolescence: Testing age- and puberty-related changes. *Human Brain*  
417 *Mapping*, 40(13), 3769–3783.
- 418 van Ewijk, H., Heslenfeld, D. J., Zwiers, M. P., Faraone, S. V., Luman, M., Hartman, C. A.,  
419 Hoekstra, P. J., et al. (2014). Different mechanisms of white matter abnormalities in  
420 attention-deficit/ hyperactivity disorder: A diffusion tensor imaging study. *Journal of the*  
421 *American Academy of Child and Adolescent Psychiatry*, 53(7), 790-799.e3. Elsevier Inc.  
422 Retrieved from <http://dx.doi.org/10.1016/j.jaac.2014.05.001>
- 423 Faraone, S. V., Asherson, P., Banaschewski, T., Biederman, J., Buitelaar, J. K., Ramos-  
424 Quiroga, J. A., Rohde, L. A., et al. (2015). Attention-deficit/hyperactivity disorder.  
425 *Nature reviews. Disease primers*, 1, 15020. Radboud University Medical Center,  
426 Donders Institute for Brain, Cognition and Behaviour, Departments of Human Genetics  
427 and Psychiatry, Nijmegen, The Netherlands. Retrieved from  
428 <http://eutils.ncbi.nlm.nih.gov/entrez/eutils/elink.fcgi?dbfrom=pubmed&id=27189265&retmode=ref&cmd=prlinks>  
429
- 430 Francx, W., Oldehinkel, M., Oosterlaan, J., Heslenfeld, D., Hartman, C. A., Hoekstra, P. J.,  
431 Franke, B., et al. (2015). The executive control network and symptomatic improvement  
432 in attention-deficit / hyperactivity disorder. *Cortex*, 73, 62–72. Elsevier Srl. Retrieved  
433 from <http://dx.doi.org/10.1016/j.cortex.2015.08.012>
- 434 Francx, W., Zwiers, M. P., Mennes, M., Oosterlaan, J., Heslenfeld, D., Hoekstra, P. J.,  
435 Hartman, C. A., et al. (2015). White matter microstructure and developmental  
436 improvement of hyperactive/impulsive symptoms in attention-deficit/hyperactivity  
437 disorder. *Journal of Child Psychology and Psychiatry and Allied Disciplines*, 56(12),  
438 1289–1297. Karakter Child and Adolescent Psychiatry University Centre, Nijmegen,  
439 The Netherlands. Retrieved from <http://doi.wiley.com/10.1111/jcpp.12379>
- 440 Franke, B., Michelini, G., Asherson, P., Banaschewski, T., Bilbow, A., Buitelaar, J. K.,

- 441 Cormand, B., et al. (2018). Live fast , die young ? A review on the developmental  
442 trajectories of ADHD across the lifespan. *European Neuropsychopharmacology*, 28(10),  
443 1059–1088. Elsevier B.V. Retrieved from  
444 <https://doi.org/10.1016/j.euroneuro.2018.08.001>
- 445 Giorgio, A., Watkins, K. E., Douaud, G., James, A. C., James, S., De Stefano, N., Matthews,  
446 P. M., et al. (2008). Changes in white matter microstructure during adolescence.  
447 *NeuroImage*, 39(1), 52–61.
- 448 Halperin, J. M., & Schulz, K. P. (2006). Revisiting the role of the prefrontal cortex in the  
449 pathophysiology of attention-deficit/hyperactivity disorder. *Psychological bulletin*,  
450 132(4), 560–581. Department of Psychology, Queens College of the City University of  
451 New York, Flushing, NY 11367, USA. [jeffrey.halperin@qc.cuny.edu](mailto:jeffrey.halperin@qc.cuny.edu). Retrieved from  
452 [http://eutils.ncbi.nlm.nih.gov/entrez/eutils/elink.fcgi?dbfrom=pubmed&id=16822167&r](http://eutils.ncbi.nlm.nih.gov/entrez/eutils/elink.fcgi?dbfrom=pubmed&id=16822167&retmode=ref&cmd=prlinks)  
453 [etmode=ref&cmd=prlinks](http://eutils.ncbi.nlm.nih.gov/entrez/eutils/elink.fcgi?dbfrom=pubmed&id=16822167&retmode=ref&cmd=prlinks)
- 454 Hoogman, M., Bralten, J., Hibar, D. P., Mennes, M., Zwiers, M. P., Schweren, L. S. J., van  
455 Hulzen, K. J. E., et al. (2017). Subcortical brain volume differences in participants with  
456 attention deficit hyperactivity disorder in children and adults: a cross-sectional mega-  
457 analysis. *The Lancet Psychiatry*, 4(4), 310–319.
- 458 Kochunov, P., Williamson, D. E., Lancaster, J., Fox, P., Cornell, J., Blangero, J., & Glahn, D.  
459 C. (2012). Fractional anisotropy of water diffusion in cerebral white matter across the  
460 lifespan. *Neurobiology of Aging*, 33(1), 9–20. Retrieved from  
461 <https://linkinghub.elsevier.com/retrieve/pii/S0197458010000448>
- 462 Lahey, B. B., & Willcutt, E. G. (2010). Predictive Validity of a Continuous Alternative to  
463 Nominal Subtypes of Attention-Deficit/Hyperactivity Disorder for DSM – V. *Journal of*  
464 *Clinical Child & Adolescent Psychology*, 39(6), 761–775. Retrieved from  
465 <http://www.tandfonline.com/doi/abs/10.1080/15374416.2010.517173>

- 466 Lebel, C., & Deoni, S. (2018). The development of brain white matter microstructure.  
467 *NeuroImage*, 182(3), 207–218. Retrieved from  
468 <https://linkinghub.elsevier.com/retrieve/pii/S1053811917311217>
- 469 Madhyastha, T., Mérillat, S., Hirsiger, S., Bezzola, L., Liem, F., Grabowski, T., & Jäncke, L.  
470 (2014). Longitudinal reliability of tract-based spatial statistics in diffusion tensor  
471 imaging. *Human Brain Mapping*, 35(9), 4544–4555.
- 472 Marcus, D. K., & Barry, T. D. (2011). Does attention-deficit/hyperactivity disorder have a  
473 dimensional latent structure? A taxometric analysis. *Journal of Abnormal Psychology*,  
474 120(2), 427–442. Retrieved from <http://doi.apa.org/getdoi.cfm?doi=10.1037/a0021405>
- 475 Moreno-López, Y., Olivares-Moreno, R., Cordero-Erausquin, M., & Rojas-Piloni, G. (2016).  
476 Sensorimotor integration by corticospinal system. *Frontiers in Neuroanatomy*,  
477 10(MAR), 1–6.
- 478 Müller, U. C., Asherson, P., Banaschewski, T., Buitelaar, J. K., Ebstein, R. P., Eisenberg, J.,  
479 Gill, M., et al. (2011a). The impact of study design and diagnostic approach in a large  
480 multi-centre ADHD study. Part 1: ADHD symptom patterns. *BMC Psychiatry*, 11(1),  
481 54. BioMed Central Ltd. Retrieved from  
482 <http://bmcp psychiatry.biomedcentral.com/articles/10.1186/1471-244X-11-54>
- 483 Müller, U. C., Asherson, P., Banaschewski, T., Buitelaar, J. K., Ebstein, R. P., Eisenberg, J.,  
484 Gill, M., et al. (2011b). The impact of study design and diagnostic approach in a large  
485 multi-centre ADHD study: Part 2: Dimensional measures of psychopathology and  
486 intelligence. *BMC Psychiatry*, 11(1), 55. BioMed Central Ltd.
- 487 Paus, T., Collins, D. L., Evans, A. C., Leonard, G., Pike, B., & Zijdenbos, A. (2001).  
488 Maturation of white matter in the human brain: A review of magnetic resonance studies.  
489 *Brain Research Bulletin*, 54(3), 255–266.
- 490 Peters, B. D., Szeszko, P. R., Radua, J., Ikuta, T., Gruner, P., Derosse, P., Zhang, J. P., et al.

- 491 (2012). White matter development in adolescence: Diffusion tensor imaging and meta-  
492 analytic results. *Schizophrenia Bulletin*, 38(6), 1308–1317.
- 493 von Rhein, D., Mennes, M., van Ewijk, H., Groenman, A. P., Zwiers, M. P., Oosterlaan, J.,  
494 Heslenfeld, D., et al. (2015). The NeuroIMAGE study: a prospective phenotypic,  
495 cognitive, genetic and MRI study in children with attention-deficit/hyperactivity  
496 disorder. Design and descriptives. *European Child and Adolescent Psychiatry*, 24(3),  
497 265–281. Centre for Cognitive Neuroscience, Donders Institute for Brain, Cognition and  
498 Behaviour, Radboud University Medical Centre, Nijmegen, The Netherlands,  
499 Daniel.vonRhein@gmail.com. Retrieved from  
500 [http://eutils.ncbi.nlm.nih.gov/entrez/eutils/elink.fcgi?dbfrom=pubmed&id=25012461&r](http://eutils.ncbi.nlm.nih.gov/entrez/eutils/elink.fcgi?dbfrom=pubmed&id=25012461&retmode=ref&cmd=prlinks)  
501 [etmode=ref&cmd=prlinks](http://eutils.ncbi.nlm.nih.gov/entrez/eutils/elink.fcgi?dbfrom=pubmed&id=25012461&retmode=ref&cmd=prlinks)
- 502 Du Rietz, E., Cheung, C. H. M., McLoughlin, G., Brandeis, D., Banaschewski, T., Asherson,  
503 P., & Kuntsi, J. (2016). Self-report of ADHD shows limited agreement with objective  
504 markers of persistence and remittance. *Journal of Psychiatric Research*.
- 505 Shaw, P., Sudre, G., Wharton, A., Weingart, D., Sharp, W., & Sarlls, J. (2015). White matter  
506 microstructure and the variable adult outcome of childhood attention deficit  
507 hyperactivity disorder. *Neuropsychopharmacology*, 40(3), 746–754. Nature Publishing  
508 Group. Retrieved from <http://dx.doi.org/10.1038/npp.2014.241>
- 509 Smith, S. M., Jenkinson, M., Johansen-berg, H., Rueckert, D., Nichols, T. E., Mackay, C. E.,  
510 Watkins, K. E., et al. (2006). Tract-based spatial statistics: Voxelwise analysis of multi-  
511 subject diffusion data. *NeuroImage*, 31(4), 1487–1505.
- 512 Smith, S. M., & Nichols, T. E. (2009). Threshold-free cluster enhancement: Addressing  
513 problems of smoothing, threshold dependence and localisation in cluster inference.  
514 *NeuroImage*, 44(1), 83–98. Elsevier Inc.
- 515 Sudre, G., MangalMurthi, A., & Shaw, P. (2018). Growing out of attention deficit

- 516 hyperactivity disorder: Insights from the ‘remitted’ brain. *Neuroscience and*  
517 *Biobehavioral Reviews*, 94(September), 198–209.
- 518 Welniarz, Q., Dusart, I., & Roze, E. (2017). The corticospinal tract: Evolution, development,  
519 and human disorders. *Developmental Neurobiology*, 77(7), 810–829.
- 520 Wetterling, F., Mccarthy, H., Tozzi, L., Skokauskas, N., O’Doherty, J. P., Mulligan, A.,  
521 Meaney, J., et al. (2015). Impaired reward processing in the human prefrontal cortex  
522 distinguishes between persistent and remittent attention deficit hyperactivity disorder.  
523 *Human Brain Mapping*, 36(11), 4648–4663.
- 524 Winkler, A. M., Ridgway, G. R., Webster, M. A., Smith, S. M., & Nichols, T. E. (2014).  
525 Permutation inference for the general linear model. *NeuroImage*, 92, 381–397. The  
526 Authors.
- 527 Winkler, A. M., Webster, M. A., Vidaurre, D., Nichols, T. E., & Smith, S. M. (2015). Multi-  
528 level block permutation. *NeuroImage*, 123, 253–268. The Authors.
- 529 Wolfers, T., Onnink, A. M. H., Zwiers, M. P., Arias-Vasquez, A., Hoogman, M., Mostert, J.  
530 C., Kan, C. C., et al. (2015). Lower white matter microstructure in the superior  
531 longitudinal fasciculus is associated with increased response time variability in adults  
532 with attentiondeficit/hyperactivity disorder. *Journal of Psychiatry and Neuroscience*,  
533 40(5), 344–351.
- 534 Yendiki, A., Koldewyn, K., Kakunoori, S., Kanwisher, N., & Fischl, B. (2014). Spurious  
535 group differences due to head motion in a diffusion MRI study. *NeuroImage*, 88(88),  
536 79–90. Retrieved from <https://linkinghub.elsevier.com/retrieve/pii/S1053811913011312>
- 537 Zwiers, M. P. (2010). NeuroImage Patching cardiac and head motion artefacts in diffusion-  
538 weighted images. *NeuroImage*, 53(2), 565–575. Elsevier Inc. Retrieved from  
539 <http://dx.doi.org/10.1016/j.neuroimage.2010.06.014>

541 **Figures and tables**

542

|                                                        | TP1    |         | TP2    |         | Test Statistic  | (P)                  |
|--------------------------------------------------------|--------|---------|--------|---------|-----------------|----------------------|
|                                                        | Mean   | (SD)    | Mean   | (SD)    |                 |                      |
| Age, years                                             | 16.91  | (3.47)  | 20.57  | (3.52)  |                 |                      |
| Sex, female                                            | N = 42 | 42%     | N = 42 | 42%     |                 |                      |
| Estimated IQ                                           | 105.15 | (15.02) | 106.44 | (16.38) | F(1,100) = 0.84 | (0.38)               |
| Head motion, framewise displacement                    | 0.51   | (0.35)  | 0.47   | (0.22)  | F(1,100) = 2.41 | (<10 <sup>-4</sup> ) |
| Handedness, right                                      | N = 89 | 89%     | N = 89 | 89%     |                 |                      |
| <b><i>CPRS dimension score by diagnostic group</i></b> |        |         |        |         |                 |                      |
| Combined score                                         | 12.76  | (12.11) | 9.26   | (10.20) |                 |                      |
| Affected                                               | 24.38  | (9.63)  | 18.86  | (10.03) |                 |                      |
| Subthreshold                                           | 8.55   | (7.79)  | 7.13   | (7.55)  |                 |                      |
| Unaffected                                             | 4.04   | (4.40)  | 3.06   | (4.07)  |                 |                      |
| Inattention score                                      | 8.05   | (7.65)  | 6.02   | (6.65)  |                 |                      |
| Affected                                               | 15.05  | (5.98)  | 12.17  | (6.55)  |                 |                      |
| Subthreshold                                           | 5.64   | (5.35)  | 4.53   | (4.44)  |                 |                      |
| Unaffected                                             | 2.76   | (3.82)  | 2.06   | (3.14)  |                 |                      |
| Hyperactivity-impulsivity score                        | 4.71   | (5.30)  | 3.25   | (4.23)  |                 |                      |
| Affected                                               | 9.32   | (5.28)  | 6.69   | (4.88)  |                 |                      |
| Subthreshold                                           | 2.91   | (3.05)  | 2.60   | (3.20)  |                 |                      |
| Unaffected                                             | 1.28   | (1.64)  | 1.00   | (1.65)  |                 |                      |
| <b><i>Medication use</i></b>                           |        |         |        |         |                 |                      |
| Duration, cumulative days                              | 668    | (1,056) | 1,161  | (1,720) |                 |                      |
| Ever used, yes                                         | N = 46 | 46%     | N = 46 | 46%     |                 |                      |

543



544 **Table 1.** Demographic and clinical characteristics of the sample at NeuroIMAGE1(TP1) and  
545 NeuroIMAGE2(TP2) with mean and standard deviation. Reported values pertain to all participants in the final  
546 sample after all quality control(N=99). IQ: estimated at both timepoints using vocabulary and block design  
547 subtests of the Wechsler Intelligence Scale for Children(WISC-III) or Wechsler Adult Intelligence Scale(WAIS-  
548 III). Combined CPRS symptom score is the sum of two separate dimensions: hyperactivity-impulsivity and  
549 inattention. Medications: Ritalin(methylphenidate), Concerta(methylphenidate), Strattera(atomoxetine), and any  
550 other ADHD medication. The majority of patients were taking prescription medication for ADHD, mostly  
551 methylphenidate or atomoxetine. Medication use duration: lifetime cumulative number of days used on the day  
552 of the MRI scan (numerical integer value). Ever used: whether or not participants had ever taken ADHD  
553 medication in their lives (binary factor: yes or no).  
554

555

| Model                                         | WM tract | N <sub>voxels</sub> | MNI (Peak voxel) |                  |                  | <i>t</i> <sub>max</sub> | <i>P</i> <sub>FWE</sub> |
|-----------------------------------------------|----------|---------------------|------------------|------------------|------------------|-------------------------|-------------------------|
|                                               |          |                     | X <sub>COG</sub> | Y <sub>COG</sub> | Z <sub>COG</sub> |                         |                         |
| FA <sub>TP2</sub> ~ ΔCPRS <sub>combined</sub> | ICST     | 723                 | -21              | -27              | 44               | 0.755                   | <b>0.044</b>            |
|                                               | ISLF     | 579                 | -33              | -20              | 38               | 0.881                   | <b>0.038</b>            |
| FA <sub>TP2</sub> ~ ΔCPRS <sub>HI</sub>       | ICST     | 17                  | -18              | -25              | 52               | 0.981                   | <b>0.049</b>            |

556

557 **Table 2.** TBSS results of significant models: WM tracts, peak voxels, and localization of significant  
558 clusters ( $P_{FWE} < 0.05$ ) of voxel-wise permutation based dimensional analyses (see full composition of models in  
559 Table S1). N<sub>voxels</sub>: number of voxels, X/Y/Z<sub>COG</sub>: location of the center of gravity for the cluster (vox/mm), MNI:  
560 Montreal Neurological Institute coordinates, *t*<sub>max</sub>: highest threshold-free cluster enhancement t-statistic value per  
561 cluster, WM tract: anatomical location in a white matter tract based on the Johns Hopkins University DTI-based  
562 white-matter atlases, ICST: left corticospinal tract, ISLF: left superior longitudinal fasciculus. Model FA<sub>TP2</sub> ~  
563 ΔCPRS<sub>combined</sub>: Less combined symptom score decrease was associated with more FA at follow-up in ISLF and  
564 ICST. Model FA<sub>TP2</sub> ~ ΔCPRS<sub>HI</sub>: The negative effect in the previous model was driven by HI score remission.

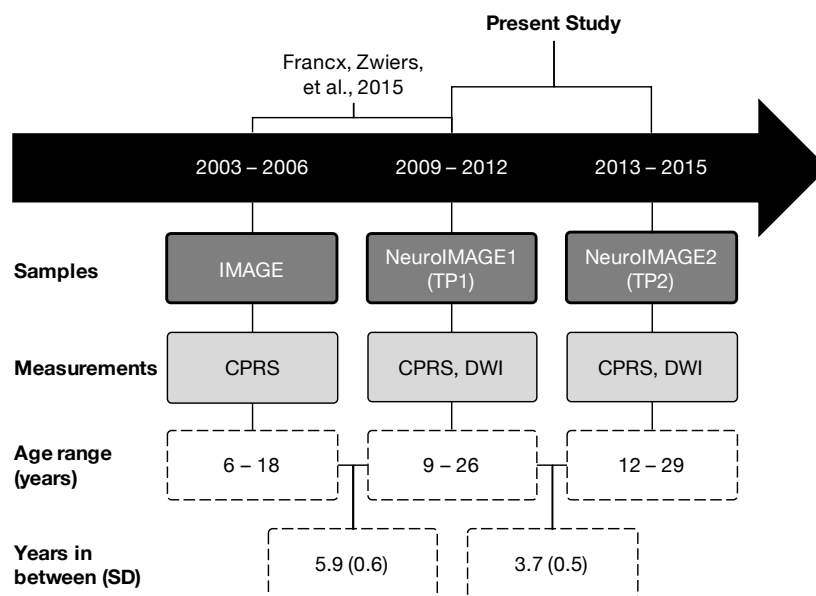565  
566

567 **Figure 1.** Schematic diagram of how this study chronologically relates to a previous study, samples included,  
568 relevant clinical and imaging measurements, study sample age ranges, and mean years (standard deviation) in  
569 between each measurement time-point (Francx, Zwiers, et al., 2015; Müller et al., 2011b; von Rhein et al.,  
570 2015). The present study is an analysis of TP1 and TP2. DWI: diffusion-weighted imaging, CPRS: Conners  
571 Parent Rating Scale (Conners et al., 1999).

572

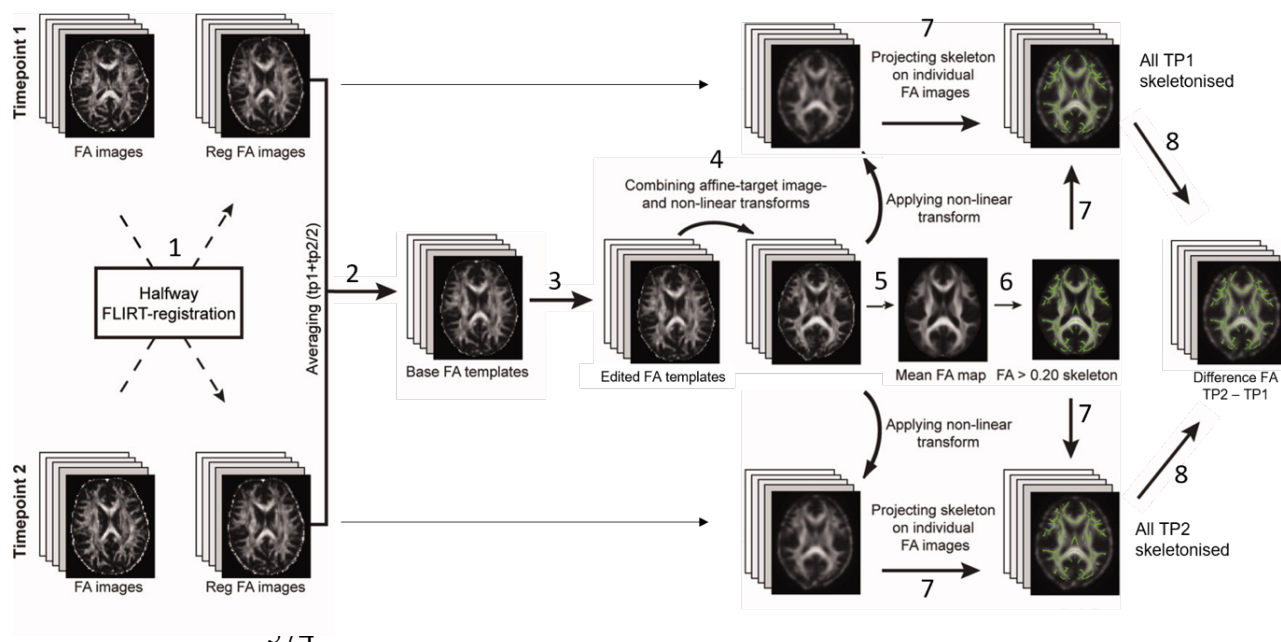

575 **Figure 2.** Our longitudinal TBSS pipeline was adapted to create a nonbiased individual subject template for use  
576 as a base template (2), which was then non-linearly registered to FMRIB58 FA standard-space (4), to create a  
577 mean FA skeleton (5), onto which each subject's aligned FA data from both time points was projected (7).

578

579

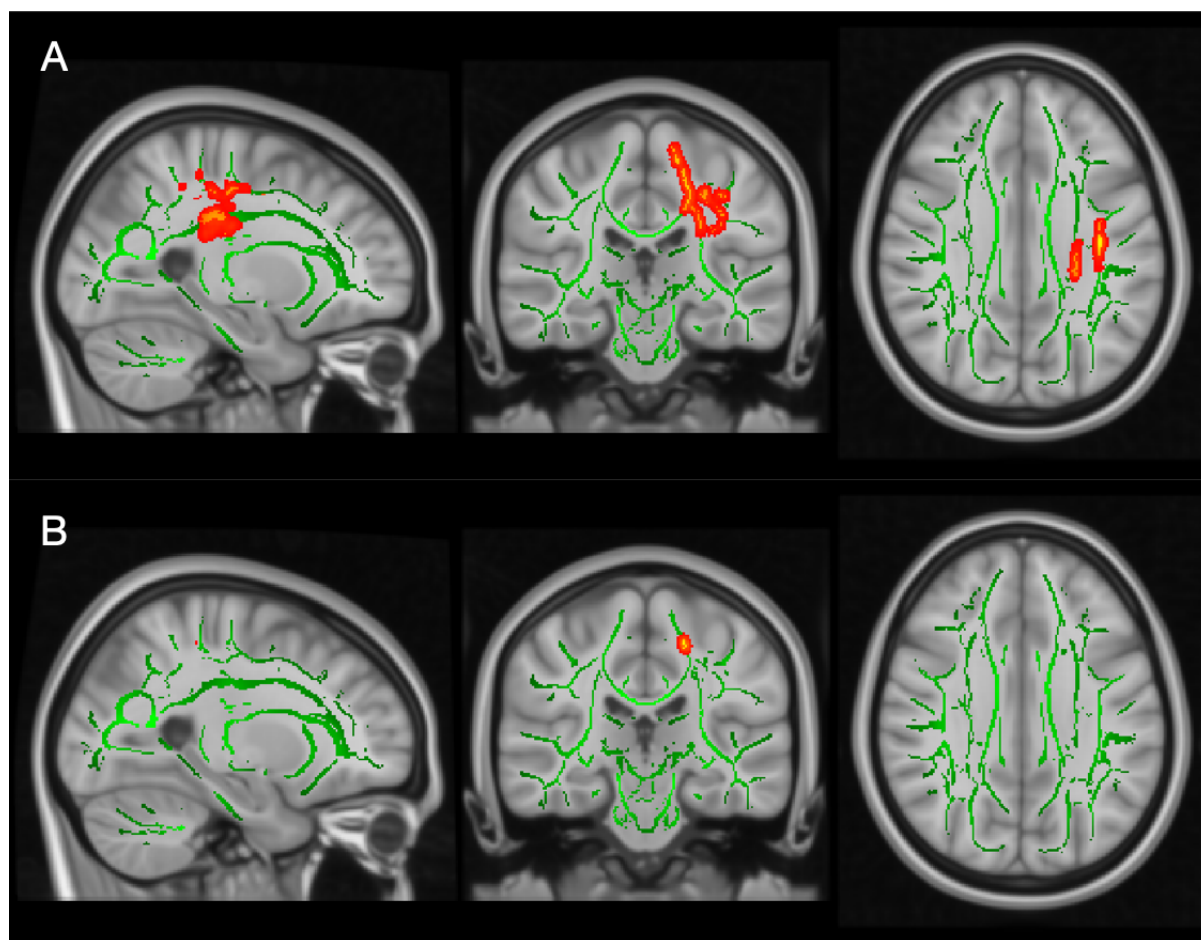

580

581 **Figure 3.** TBSS results showing significant associations (red-yellow) between FA values and the CPRS  
582 dimension scores over time. The mean FA skeleton across all subjects (green) was overlain on the MNI template  
583 image for presentation ( $x=-25$ ,  $y=-25$ ,  $z=31$ ). Results were thickened for visualization (FSL “tbss\_fill”) and  
584 presented here in radiological convention from sagittal, coronal, and axial perspectives, respectively. **(A)** Lower  
585 FA values at follow-up (TP2) were associated with a larger decrease in combined symptom score in the left  
586 superior longitudinal fasciculus (ISLF) ( $P_{FWE}=0.038$ ) and the left corticospinal tract (ICST) ( $P_{FWE}=0.044$ );  
587 **(B)** Lower FA values at TP2 were associated with a larger decrease in HI symptom score in ICST ( $P_{FWE}=0.049$ ).  
588

589 **Supplementary materials**

590

|                |                                                                                                                    |
|----------------|--------------------------------------------------------------------------------------------------------------------|
| <b>Model 1</b> | $FA_{TP1} \sim \Delta CPRS + age_{TP1} + \Delta age + sex + CPRS_{TP1} + head\ motion_{TP1}$                       |
| <b>Model 2</b> | $FA_{TP2} \sim \Delta CPRS + age_{TP1} + \Delta age + sex + CPRS_{TP1} + head\ motion_{TP2}$                       |
| <b>Model 3</b> | $\Delta FA \sim \Delta CPRS + age_{TP1} + \Delta age + sex + CPRS_{TP1} + head\ motion_{TP1} + head\ motion_{TP2}$ |

591

592 **Table S1.** Composition of our three general linear models. We essentially have a cross-lagged design with  
593 fractional anisotropy (FA) as the dependent variable. The difference in CPRS ( $\Delta CPRS = CPRS_{TP1} - CPRS_{TP2}$ ) is  
594 the predictor variable in all models. For each model, CPRS score could be the inattention, hyperactivity-  
595 impulsivity, or combined score. The outcome variables of these models are, respectively: FA at baseline (TP1),  
596 FA at follow-up (TP2), and change in FA. Permutation analysis (PALM) necessitated that we kept the (TBSS  
597 output) FA image as the dependent variable. We covaried for participant baseline age, change in years of age,  
598 sex, baseline CPRS symptom score, and framewise displacement head motion at the relevant FA time-point in  
599 the dependent variable.

600

601

| Exploratory model                  | WM tract | N <sub>voxels</sub> | MNI (Peak voxel) |                  |                  | <i>t</i> <sub>max</sub> | <i>P</i> <sub>FWE</sub> |
|------------------------------------|----------|---------------------|------------------|------------------|------------------|-------------------------|-------------------------|
|                                    |          |                     | X <sub>COG</sub> | Y <sub>COG</sub> | Z <sub>COG</sub> |                         |                         |
| $\Delta FA \sim \Delta CPRS_{III}$ | IIFOF    | 508                 | -29              | 24               | 17               | 0.441                   | 0.041                   |
|                                    | IIFOF    | 376                 | -17              | 31               | -10              | 0.613                   | 0.035                   |
|                                    | Fmin     | 339                 | -18              | 50               | 0                | 0.585                   | 0.042                   |
|                                    | IUNC     | 174                 | -25              | 17               | -8               | 0.564                   | 0.045                   |
|                                    | ICST     | 158                 | -22              | -13              | 8                | 0.562                   | 0.047                   |
|                                    | Fmin     | 22                  | -20              | 38               | 21               | 0.563                   | 0.049                   |
|                                    | CCG      | 17                  | -17              | 32               | 23               | 0.562                   | 0.049                   |
|                                    | IIFOF    | 11                  | -28              | 15               | -1               | 0.563                   | 0.049                   |
|                                    | Fmin     | 11                  | -18              | 46               | 17               | 0.566                   | 0.049                   |
|                                    | Fmin     | 9                   | -12              | 41               | -17              | 0.563                   | 0.049                   |

602

603 **Table S2.** Exploratory *post-hoc* analysis results. Greater HI symptom decrease was associated with a larger

604 decrease in FA over time in several WM clusters. P-values reported here were not adjusted for multiple testing.

605 IIFOF: left inferior fronto-occipital fasciculus, Fmin: forceps minor of the corpus callosum, IUNC: left uncinate

606 fasciculus, CCG: cingulum cingulate gyrus.

607

608

| Model                                  | WM tract | N <sub>voxels</sub> | MNI (Peak voxel) |                  |                  | $t_{max}$ | $P_{FWE}$ | age <sub>TP1</sub> interaction $P$ |
|----------------------------------------|----------|---------------------|------------------|------------------|------------------|-----------|-----------|------------------------------------|
|                                        |          |                     | X <sub>COG</sub> | Y <sub>COG</sub> | Z <sub>COG</sub> |           |           |                                    |
| $FA_{TP2} \sim \Delta CPRS_{combined}$ | ICST     | 723                 | -21              | -27              | 44               | 0.755     | 0.044     | 0.463                              |
|                                        | ISLF     | 579                 | -33              | -20              | 38               | 0.881     | 0.038     | 0.808                              |
| $FA_{TP2} \sim \Delta CPRS_{III}$      | ICST     | 17                  | -18              | -25              | 52               | 0.981     | 0.049     | 0.154                              |
| $\Delta FA \sim \Delta CPRS_{III}$     | IIFOF    | 508                 | -29              | 24               | 17               | 0.441     | 0.041     | 0.667                              |
|                                        | IIFOF    | 376                 | -17              | 31               | -10              | 0.613     | 0.035     | 0.055                              |
|                                        | Fmin     | 339                 | -18              | 50               | 0                | 0.585     | 0.042     | 0.874                              |
|                                        | IUNC     | 174                 | -25              | 17               | -8               | 0.564     | 0.045     | 0.131                              |
|                                        | ICST     | 158                 | -22              | -13              | 8                | 0.562     | 0.047     | 0.130                              |
|                                        | Fmin     | 22                  | -20              | 38               | 21               | 0.563     | 0.049     | 0.239                              |
|                                        | CCG      | 17                  | -17              | 32               | 23               | 0.562     | 0.049     | 0.238                              |
|                                        | IIFOF    | 11                  | -28              | 15               | -1               | 0.563     | 0.049     | 0.238                              |
|                                        | Fmin     | 11                  | -18              | 46               | 17               | 0.566     | 0.049     | 0.239                              |
|                                        | Fmin     | 9                   | -12              | 41               | -17              | 0.563     | 0.049     | 0.237                              |

609

610 **Table S3.** Interaction effects of  $\Delta CPRS$  and age at TP1 for significant models.

611

612

| $\Delta$ CPRS score       | Spearman's $\rho$ | <i>P</i> |
|---------------------------|-------------------|----------|
| Combined                  | 0.038             | 0.709    |
| Hyperactivity-impulsivity | 0.098             | 0.331    |
| Inattention               | -0.007            | 0.948    |

613

614 **Table S4.** No significant correlation (Spearman's rho) between difference in CPRS score ( $\Delta$ CPRS=CPRS<sub>TP1</sub>–

615 CPRS<sub>TP2</sub>) and right-handedness in our sample.

616



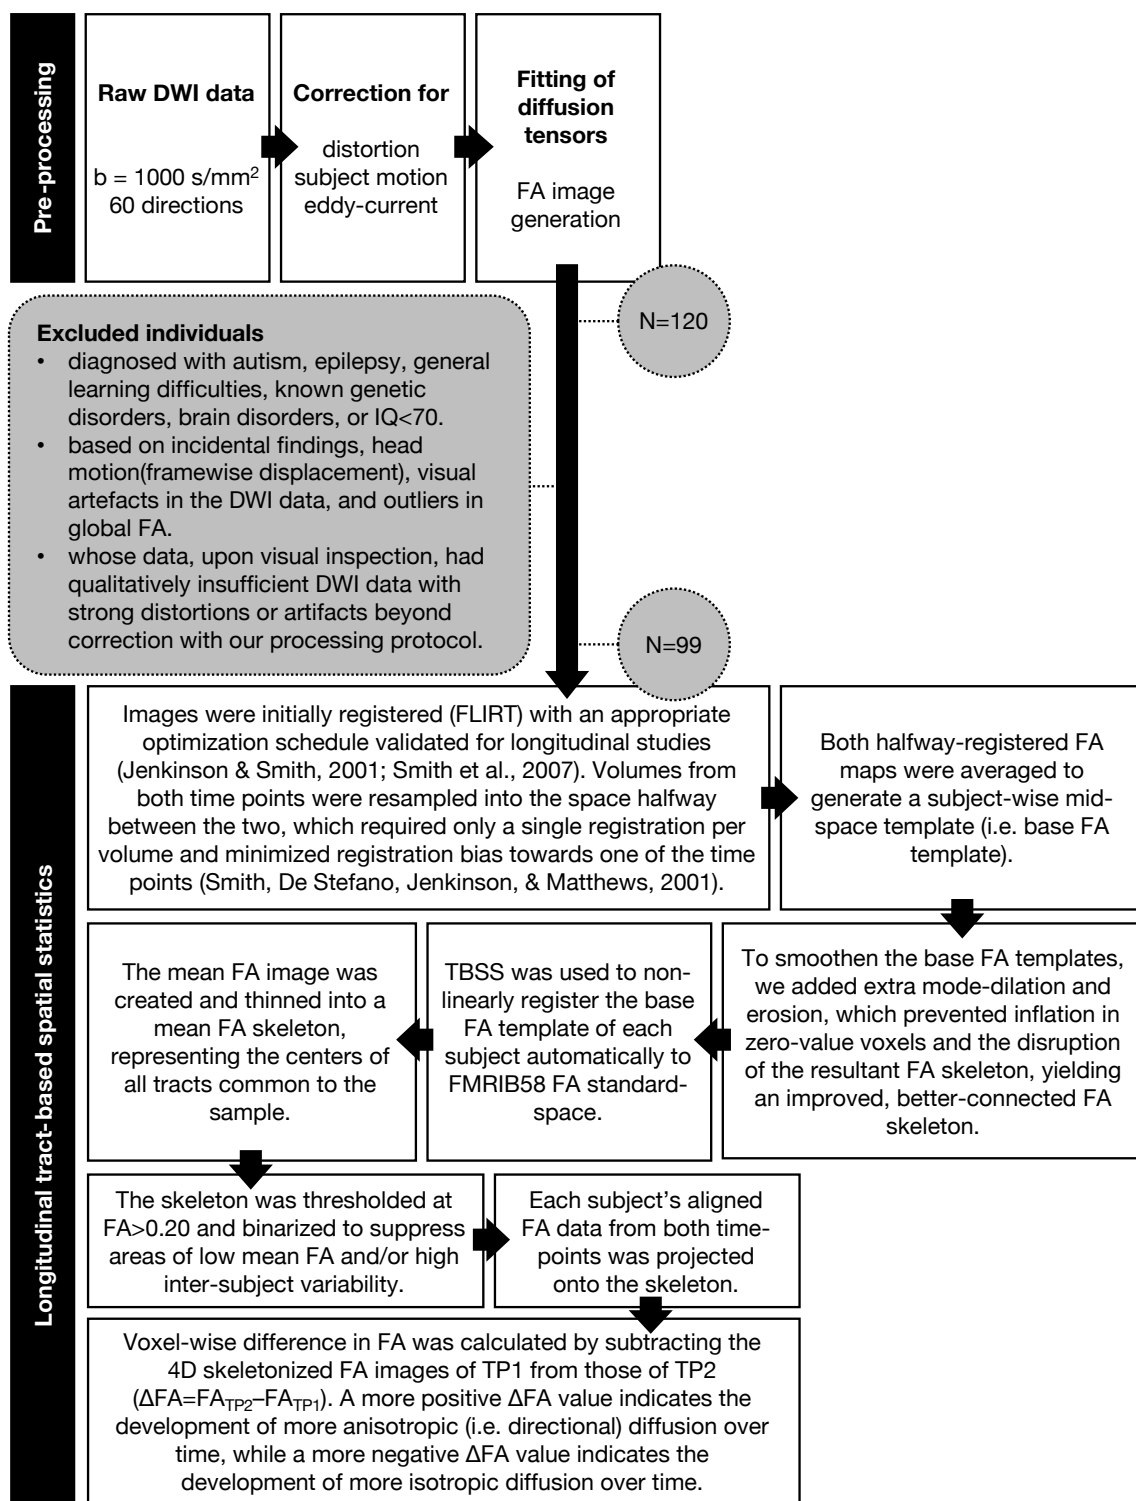

617  
618 **Figure S1.** Processing pipeline. During pre-processing, DWI images were realigned and corrected for residual  
619 eddy current and for motion artefacts using robust tensor modelling (PATCH)(Zwiers, 2010). Diffusion tensor  
620 characteristics and FA values were calculated for each voxel(Behrens et al., 2003). After pre-processing, we  
621 used a custom longitudinal TBSS pipeline adapted from others to create non-biased individual subject templates  
622 (Madhyastha et al., 2014).

623

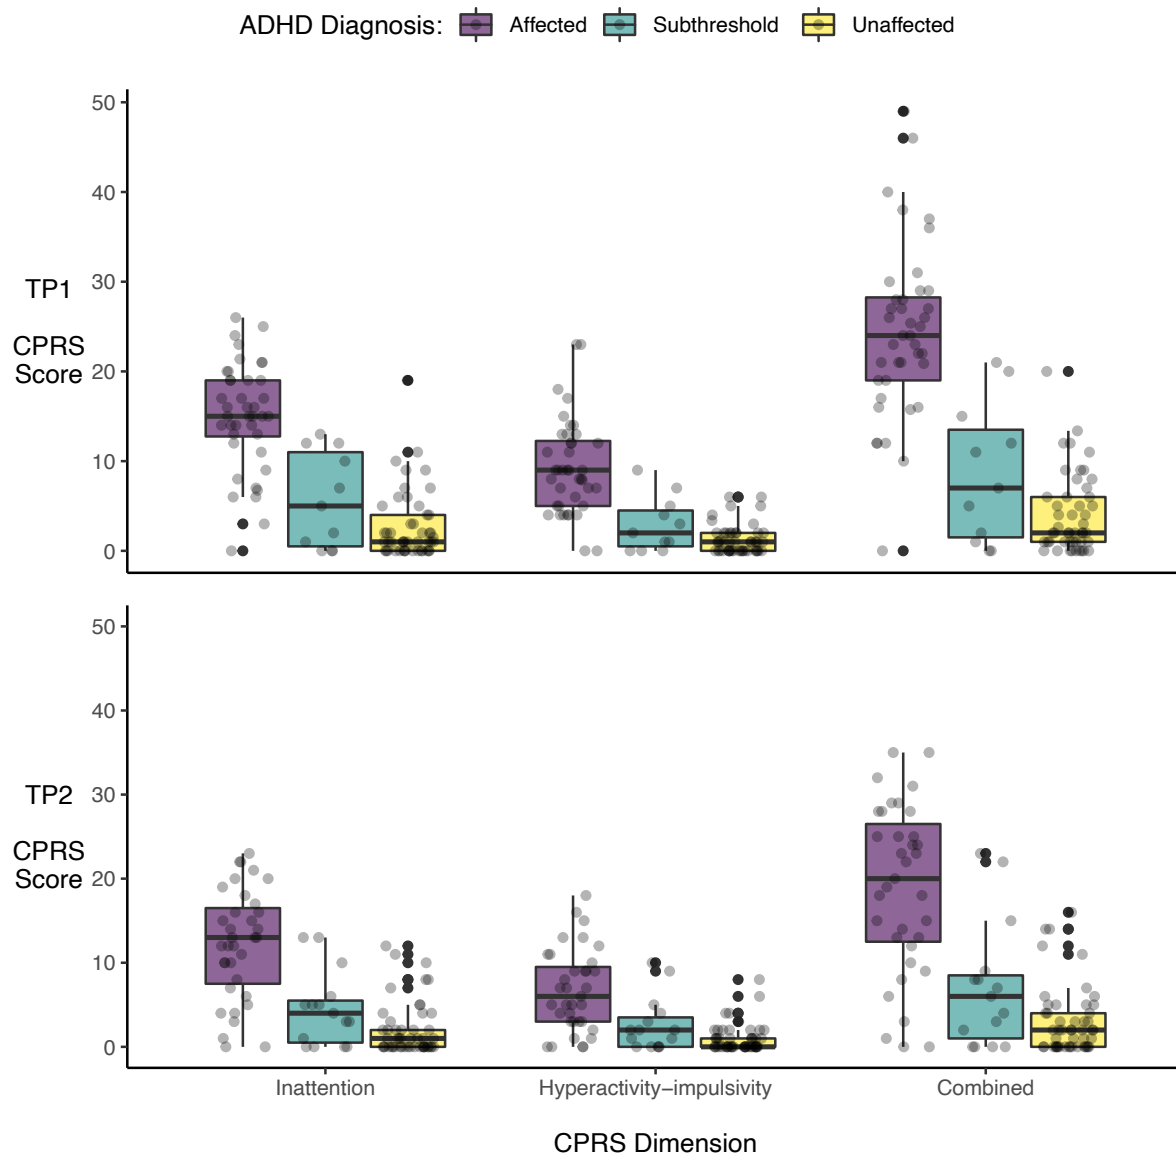

624

625 **Figure S2.** Jittered scatterplots overlain with boxplots of individual Connors Parent Rating Scale (CPRS)

626 dimension scores colored by clinical diagnosis group at baseline (TP1; top panel) and follow-up (TP2; bottom

627 panel).

628

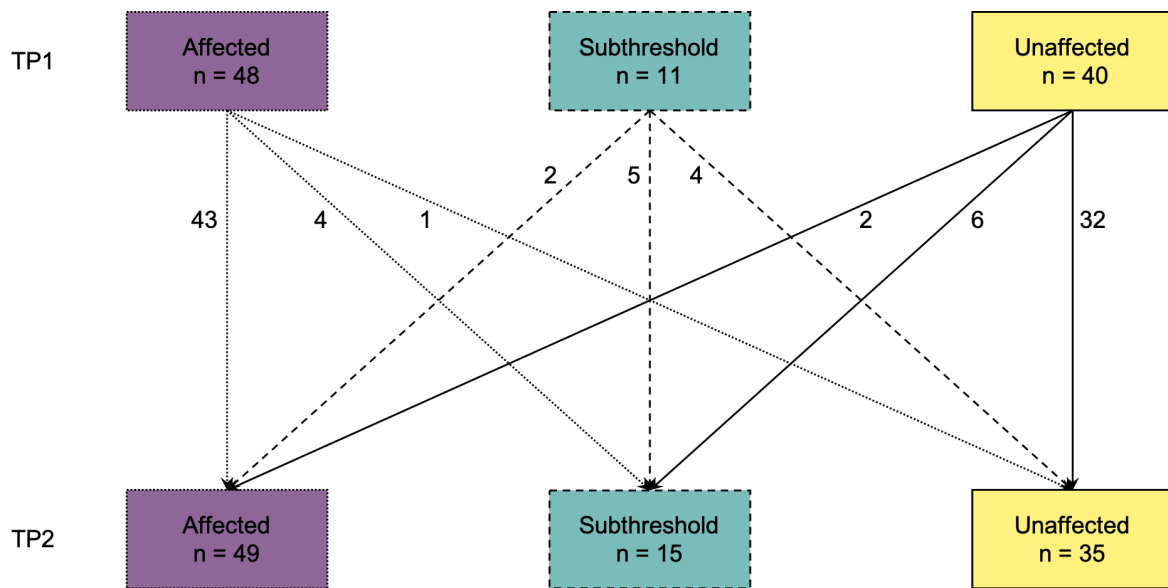

629  
630

631 **Figure S3.** Changes in the diagnostic make-up of our study sample (N=99). Although the total number of  
632 participants remained constant, the number of individuals in each diagnosis group changed between time-  
633 point 1 (TP1) and time-point 2 (TP2).

634  
635

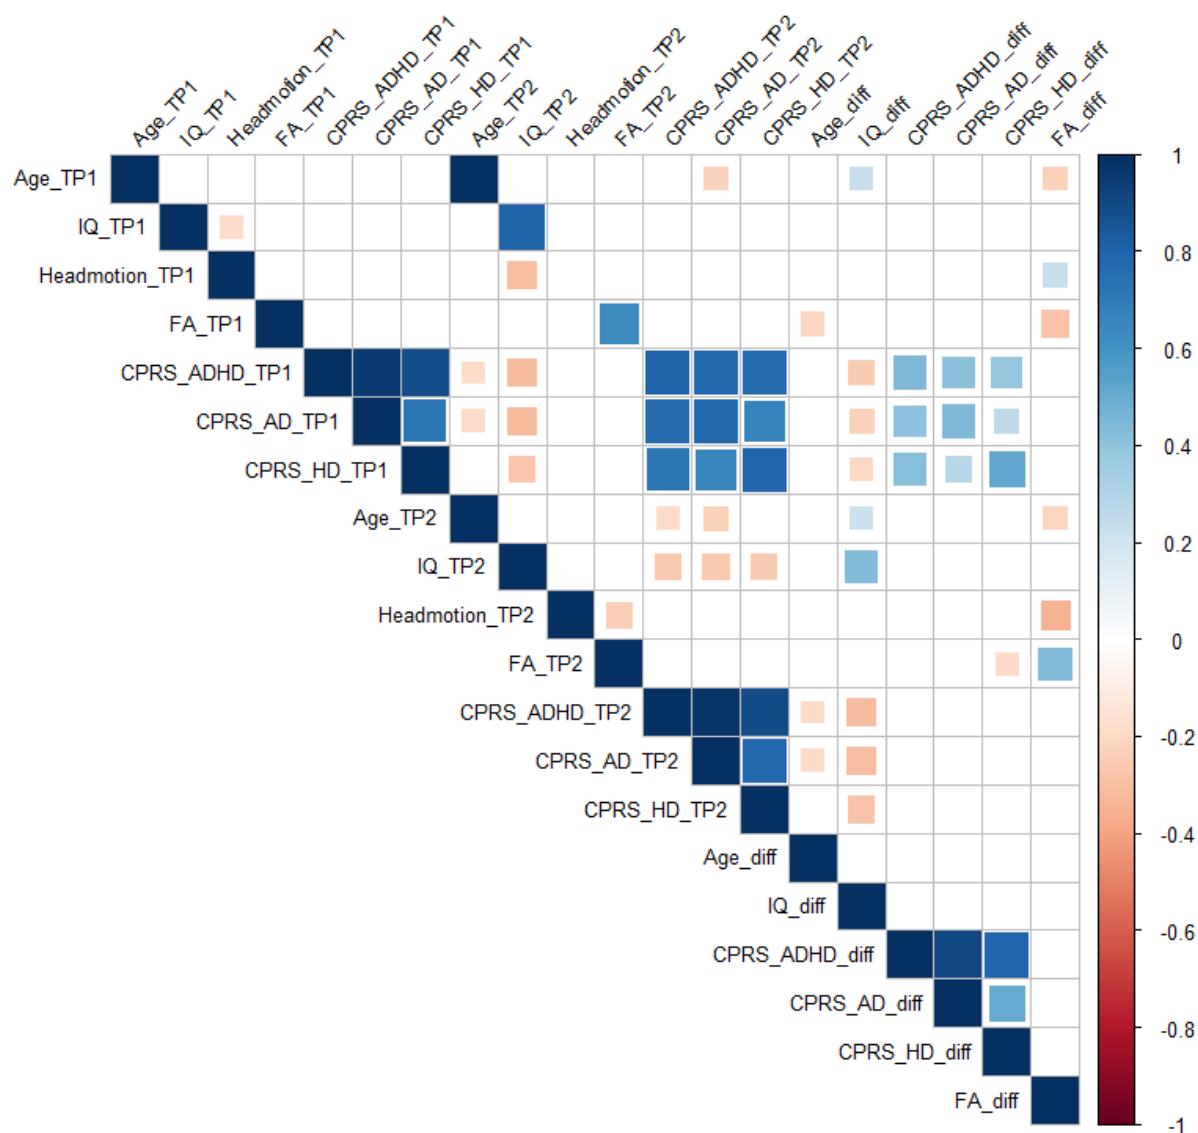

636  
 637 **Figure S4.** Spearman correlation matrix of independent and dependent variables, as well as covariates. These  
 638 correlation tests were performed before the main analyses. The color intensity of each box indicates the  
 639 magnitude of the correlation. Positive correlations are presented in blue and negative correlations in red. The  
 640 size of the box indicates its significance, with significant correlations filling each square completely.

641  
 642  
 643  
 644

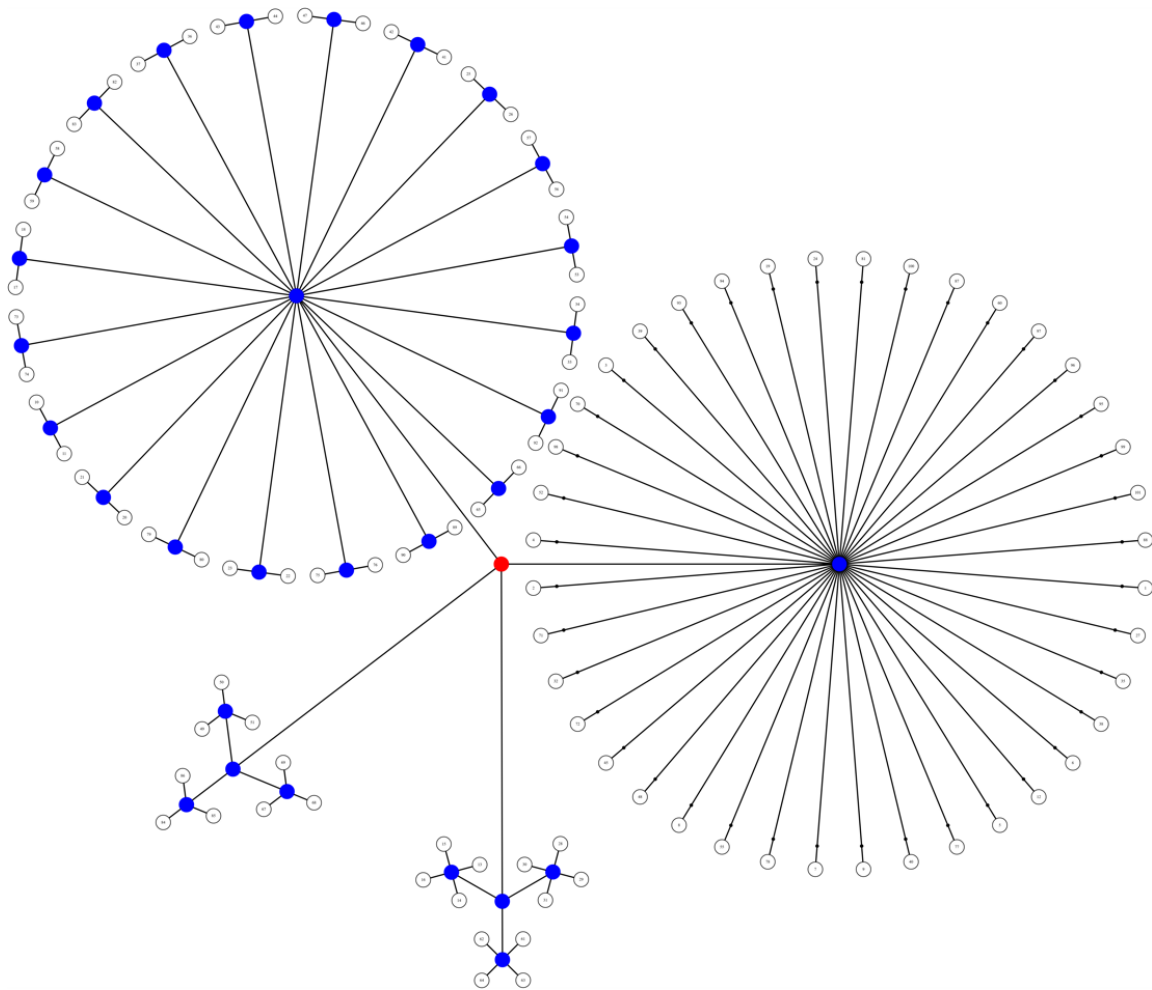

645

646

647

648

649

650

651

652

**Figure S5.** Visual representation of the multi-level notation of family structure in our sample. The four groups represent the size of each family: 3 families of 3 children, 3 families of 4 children, 20 families of 2 children, and 40 families of 1 child in the study. We depict the levels as branches from the central red node, akin to a tree in which the most peripheral elements (leaves) represent the observations. The nodes from which the branches depart either allow (blue) or do not allow (red) permutations.

653

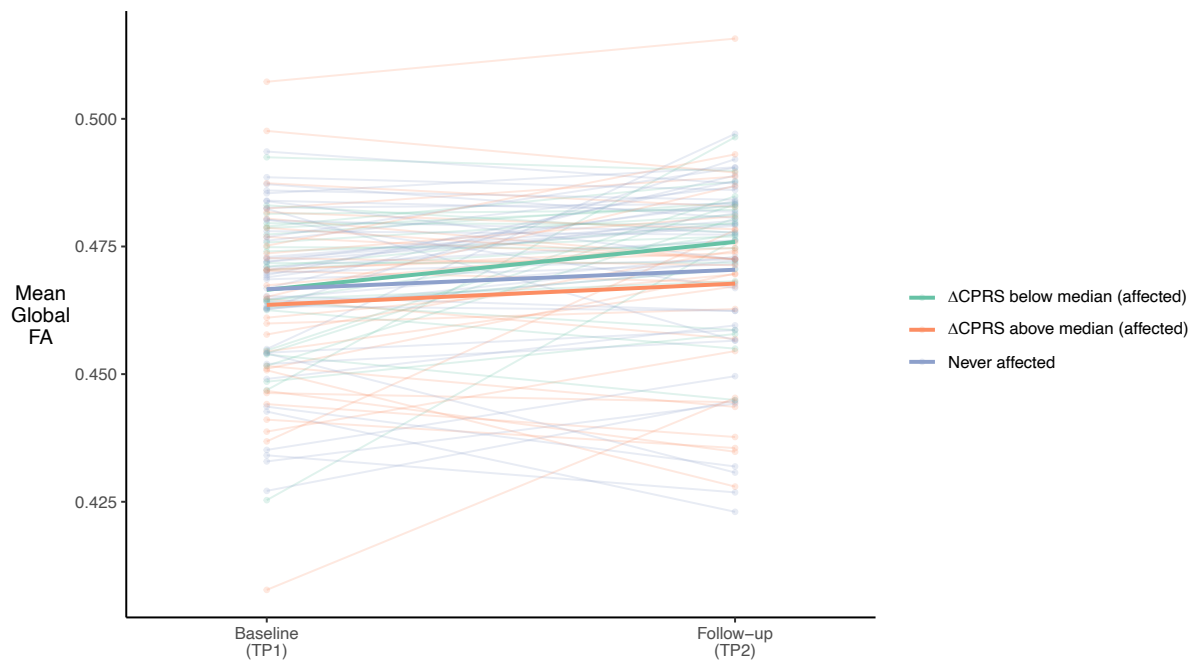

654

655

656 **Figure S6.** Line plot illustrating individual changes in average whole-brain fractional anisotropy (FA) from  
657 baseline to follow-up, grouped by never affected participants (blue) versus affected participants (including  
658 subthreshold). Here, affected individuals are further split along the median into two groups according to whether  
659 their change in combined Conners Parent Rating Scale score ( $\Delta$ CPRS) was above (orange) or below (green) the  
660 affected sample's median of that change.

661

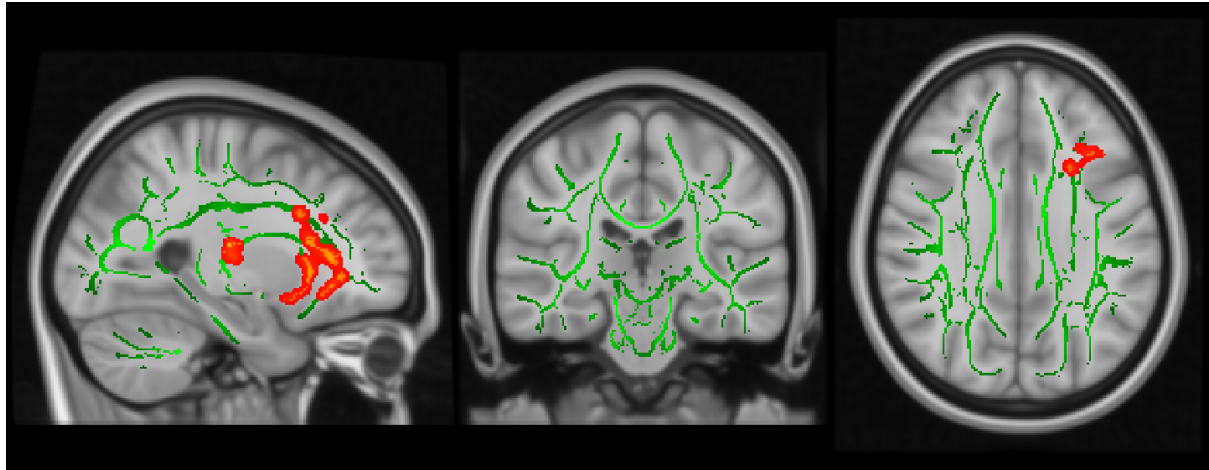

662

663 **Figure S7.** Exploratory dimensional TBSS analyses showing significant associations (red-yellow) between FA  
664 values and the CPRS scores over time. The mean FA skeleton across all subjects (green) was overlain on the  
665 MNI template image for presentation ( $x=-25$ ,  $y=-25$ ,  $z=31$ ). Results were thickened for visualization (FSL  
666 “tbss\_fill”) and presented here in radiological convention from sagittal, coronal, and axial perspectives,  
667 respectively. A more negative change in FA (i.e. more isotropic diffusion) over time was associated with more  
668 HI symptom remission in ten clusters spread over six WM tracts. See Table S2 for cluster statistics and  
669 locations.

670
